# Supplementary material for: Impact of Endoluminal Radiofrequency Ablation on Immunity in Pancreatic Cancer and Cholangiocarcinoma
Source: MDPI journal article supplement (doi:10.3390/biomedicines10061331), 2022-06-06
Supplement: s1 [file s1]

Supplementary Table S1. Association between cytokine overexpression and survival.

| PDAC          | AG  |     |             | UG  |     |              |                 |
|---------------|-----|-----|-------------|-----|-----|--------------|-----------------|
|               | NOC | NOE | MS          | NOC | NOE | MS           | p*              |
| IL-1 $\alpha$ | 6   | 1   | N/A         | 143 | 81  | 19.58        | 0.0925          |
| IL-1 $\beta$  | 11  | 4   | 34.79       | 138 | 78  | 19.48        | 0.250           |
| IL-6          | 12  | 5   | 49.34       | 137 | 77  | 19.65        | 0.603           |
| IL-18         | 14  | 9   | 15.11       | 135 | 73  | 19.81        | 0.796           |
| IL-33         | 10  | 6   | 43.76       | 139 | 76  | 19.65        | 0.530           |
| IL-36 $\beta$ | 10  | 4   | 19.81       | 139 | 78  | 19.58        | 0.460           |
| TNF $\alpha$  | 14  | 9   | 22.70       | 135 | 73  | 19.65        | 0.836           |
| IL-1RA        | 6   | 2   | 20.17       | 143 | 80  | 19.65        | 0.946           |
| IL-10         | 14  | 8   | 16.98       | 135 | 74  | 19.81        | 0.483           |
| CXCL1         | 8   | 4   | 12.91       | 141 | 78  | 19.81        | 0.794           |
| CXCL5         | 11  | 8   | 12.94       | 138 | 74  | 19.65        | 0.425           |
| CXCL8         | 12  | 9   | 10.12       | 137 | 73  | 19.94        | 0.248           |
| <b>CXCL9</b>  | 10  | 10  | <b>8.77</b> | 139 | 72  | <b>20.17</b> | <b>6.145e-4</b> |
| <b>CXCL10</b> | 13  | 12  | <b>9.82</b> | 136 | 70  | <b>20.17</b> | <b>9.738e-4</b> |
| <b>CXCL11</b> | 14  | 12  | <b>8.77</b> | 135 | 70  | <b>20.60</b> | <b>4.401e-4</b> |
| CCL21         | 9   | 4   | 17.90       | 140 | 78  | 19.65        | 0.999           |
| CCL2          | 9   | 4   | 24.05       | 140 | 78  | 19.58        | 0.611           |
| CCL5          | 9   | 6   | 16.98       | 140 | 76  | 19.94        | 0.0774          |

| CCC           | AG  |     |             | UG  |     |              |               |
|---------------|-----|-----|-------------|-----|-----|--------------|---------------|
|               | NOC | NOE | MS          | NOC | NOE | MS           | p*            |
| IL-1 $\alpha$ | 4   | 0   | N/A         | 29  | 15  | 24.34        | 0.209         |
| IL-1 $\beta$  | 1   | 0   | N/A         | 32  | 15  | 24.34        | 0.624         |
| IL-6          | 3   | 1   | 12.65       | 30  | 14  | 24.34        | 0.612         |
| IL-18         | 1   | 1   | 63.70       | 32  | 14  | 24.34        | 0.595         |
| IL-33         | 3   | 2   | 11.14       | 30  | 13  | 30.35        | 0.0985        |
| IL-36 $\beta$ | 5   | 1   | N/A         | 28  | 14  | 24.34        | 0.315         |
| TNF $\alpha$  | 4   | 1   | 23.03       | 29  | 14  | 24.34        | 0.495         |
| IL-1RA        | 2   | 1   | 24.34       | 31  | 14  | 30.35        | 0.824         |
| IL-10         | 5   | 1   | N/A         | 28  | 14  | 23.03        | 0.446         |
| CXCL1         | 2   | 1   | 0.85        | 31  | 14  | 24.34        | 0.910         |
| CXCL5         | 3   | 2   | <b>8.90</b> | 30  | 13  | <b>30.35</b> | <b>0.0215</b> |
| CXCL8         | 3   | 0   | N/A         | 30  | 15  | 24.34        | 0.432         |
| CXCL9         | 2   | 0   | N/A         | 31  | 15  | 24.34        | 0.222         |
| CXCL10        | 3   | 0   | N/A         | 30  | 15  | 24.34        | 0.183         |
| CXCL11        | 4   | 0   | N/A         | 29  | 15  | 24.34        | 0.162         |
| CCL21         | 3   | 0   | N/A         | 30  | 15  | 23.03        | 0.233         |
| CCL2          | 5   | 1   | 12.65       | 28  | 14  | 24.34        | 0.719         |
| CCL5          | 3   | 1   | N/A         | 30  | 14  | 24.34        | 0.663         |

PDAC, pancreatic ductal adenocarcinoma; CCC, cholangiocarcinoma; AG, altered group (putative copy-number alterations; mRNA expression z-score of 1.5 relative to diploid samples); UG, unaltered group; NOC, number of cases (total); NOE, number of Events; MS, median survival (months); p, logrank test p-value

dataset: The Cancer Genome Atlas; tool: cBioPortal

Supplementary Table S2. Association between cytokine expression and tumor immune cell infiltration.

| PDAC   | II          | algorithm | COR             | Rho    | p               |
|--------|-------------|-----------|-----------------|--------|-----------------|
| CXCL1  | neutrophil  | TIMER     | <b>positive</b> | 0.39   | <b>1.31e-07</b> |
| CXCL5  | neutrophil  | TIMER     | <b>positive</b> | 0.331  | <b>9.53e-06</b> |
| CXCL8  | N/A         |           |                 |        |                 |
| CXCL9  | T cell CD8+ | TIMER     | <b>positive</b> | 0.609  | <b>9.11e-19</b> |
|        | T cell CD4+ | TIMER     | <b>positive</b> | 0.271  | <b>3.39e-04</b> |
| CXCL10 | T cell CD8+ | TIMER     | <b>positive</b> | 0.461  | <b>2.14e-10</b> |
|        | T cell CD4+ | TIMER     | NS              | 0.007  | 9.27e-01        |
| CXCL11 | T cell CD8+ | TIMER     | <b>positive</b> | 0.330  | <b>1.06e-05</b> |
|        | T cell CD4+ | TIMER     | NS              | 0.026  | 7.39e-01        |
| CCL21  | T cell CD8+ | TIMER     | <b>positive</b> | 0.536  | <b>3.99e-14</b> |
|        | T cell CD4+ | TIMER     | <b>positive</b> | 0.340  | <b>5.29e-06</b> |
| CCL2   | monocyte    | XCELL     | <b>positive</b> | 0.411  | <b>2.27e-08</b> |
|        | NK cell     | XCELL     | NS              | -0.093 | 2.28e-01        |
|        | eosinophil  | XCELL     | NS              | -0.031 | 6.92e-01        |
| CCL5   | monocyte    | XCELL     | <b>positive</b> | 0.531  | <b>7.48e-14</b> |
|        | NK cell     | XCELL     | NS              | -0.02  | 7.96e-01        |
|        | eosinophil  | XCELL     | NS              | -0.089 | 2.48e-01        |

| CCC    | II          | algorithm | COR             | Rho    | p               |
|--------|-------------|-----------|-----------------|--------|-----------------|
| CXCL1  | neutrophil  | TIMER     | NS              | 0.105  | 5.49e-01        |
| CXCL5  | neutrophil  | TIMER     | NS              | 0.319  | 6.17e-02        |
| CXCL8  | N/A         |           |                 |        |                 |
| CXCL9  | T cell CD8+ | TIMER     | <b>positive</b> | 0.448  | <b>6.96e-03</b> |
|        | T cell CD4+ | TIMER     | <b>positive</b> | 0.469  | <b>4.46e-03</b> |
| CXCL10 | T cell CD8+ | TIMER     | <b>positive</b> | 0.431  | <b>9.74e-03</b> |
|        | T cell CD4+ | TIMER     | NS              | -0.185 | 2.88e-01        |
| CXCL11 | T cell CD8+ | TIMER     | <b>positive</b> | 0.509  | <b>1.77e-03</b> |
|        | T cell CD4+ | TIMER     | NS              | 0.256  | 1.38e-01        |
| CCL21  | T cell CD8+ | TIMER     | NS              | 0.221  | 2.01e-01        |
|        | T cell CD4+ | TIMER     | NS              | -0.043 | 8.08e-1         |
| CCL2   | monocyte    | XCELL     | NS              | 0.08   | 6.49e-01        |
|        | NK cell     | XCELL     | NS              | -0.154 | 3.78e-01        |
|        | eosinophil  | XCELL     | NS              | 0.156  | 3.71e-01        |
| CCL5   | monocyte    | XCELL     | NS              | 0.092  | 5.97e-01        |
|        | NK cell     | XCELL     | NS              | 0.172  | 3.23e-01        |
|        | eosinophil  | XCELL     | NS              | -0.144 | 4.09e-01        |

PDAC, pancreatic ductal adenocarcinoma; CCC, cholangiocarcinoma; II, immune infiltrate; COR, correlation of gene expression and immune cells infiltration; N/A, gene expression not available in the tool; NS, not significant, p, logrank test p-value

dataset: The Cancer Genome Atlas; tool: TIMER
